# Supplementary material for: Contextualization Procedure and Modeling of Monocyte Specific TLR Signaling
Source: PubMed Central journal article supplement (PMC3516512; doi:10.1371/journal.pone.0049978), 2012-12-06
Supplement: pone.0049978.s003.pdf [file pone.0049978.s003.pdf]

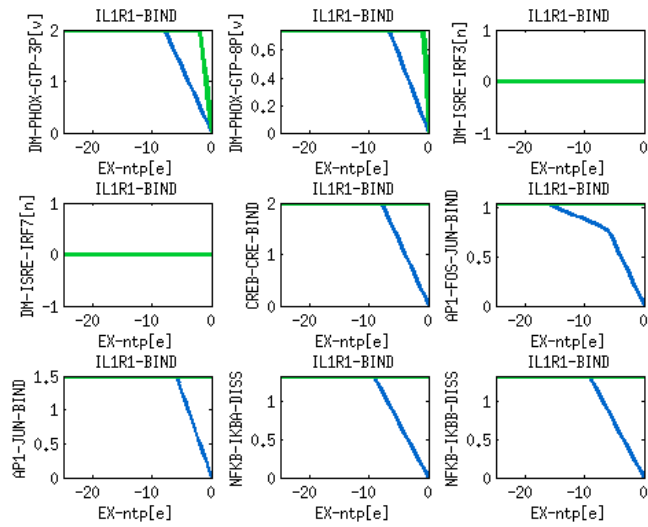

Figure 1. Sensitivity analysis

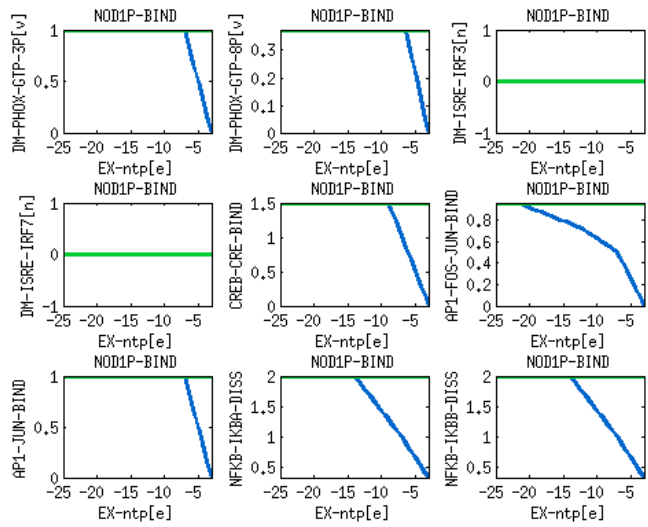

Figure 2. Sensitivity analysis

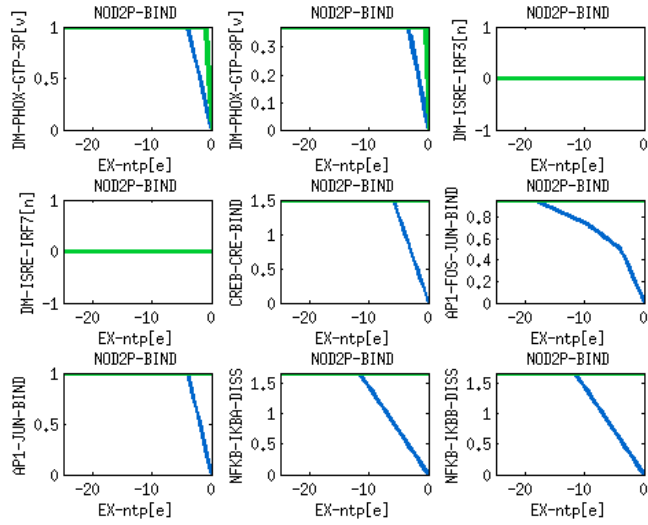

Figure 3. Sensitivity analysis

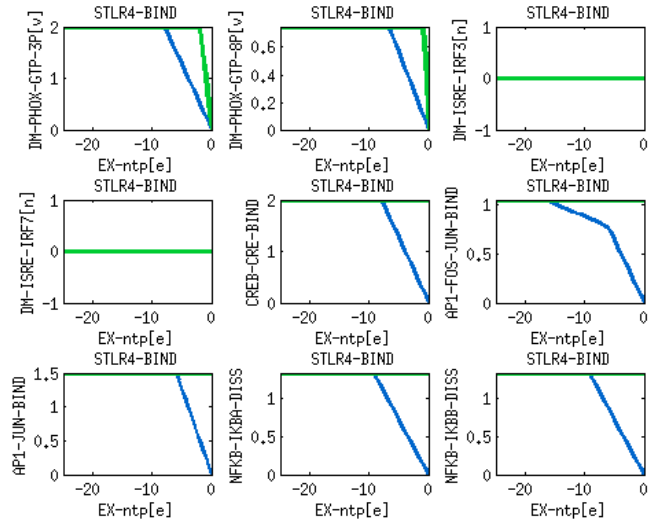

Figure 4. Sensitivity analysis

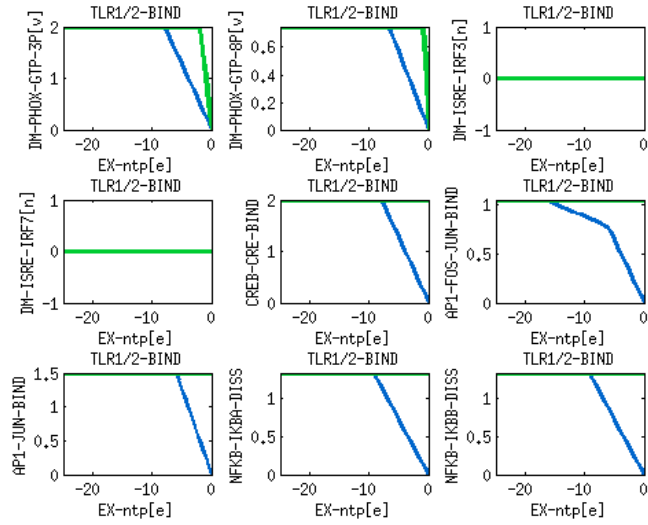

Figure 5. Sensitivity analysis

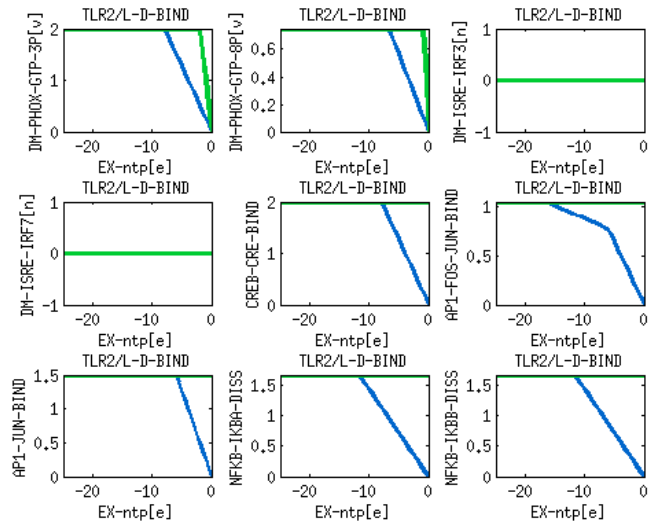

Figure 6. Sensitivity analysis

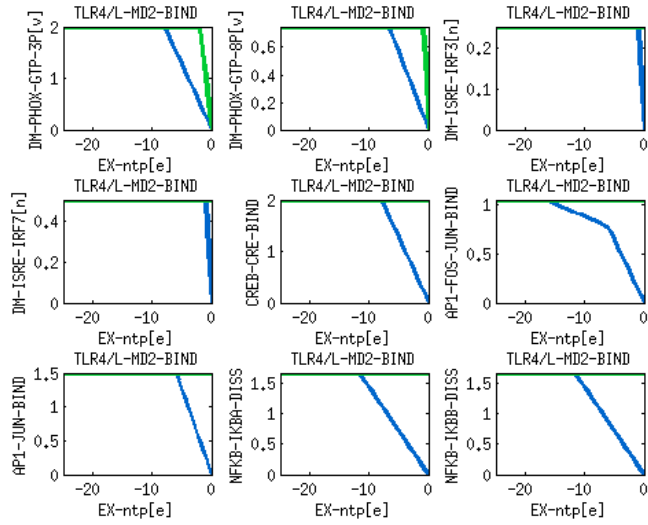

Figure 7. Sensitivity analysis

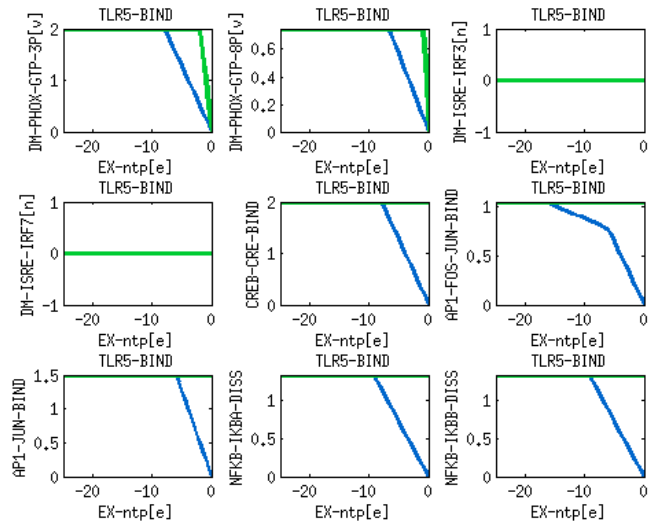

Figure 8. Sensitivity analysis

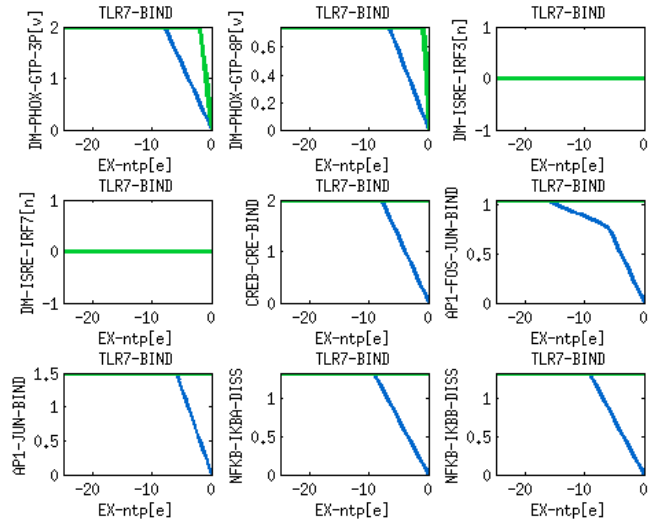

Figure 9. Sensitivity analysis

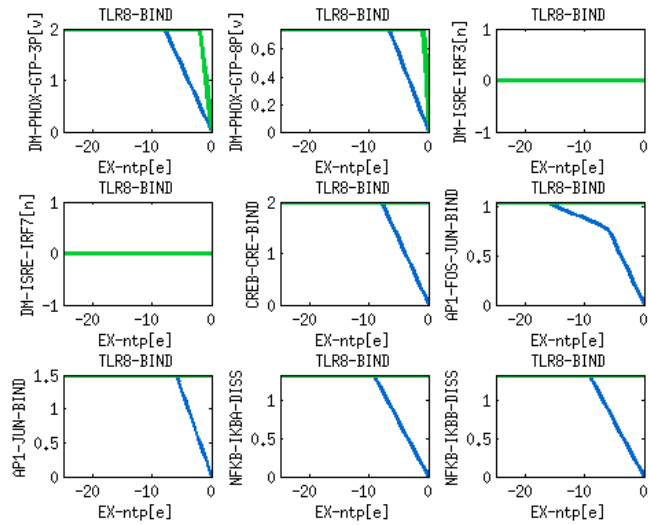

Figure 10. Sensitivity analysis

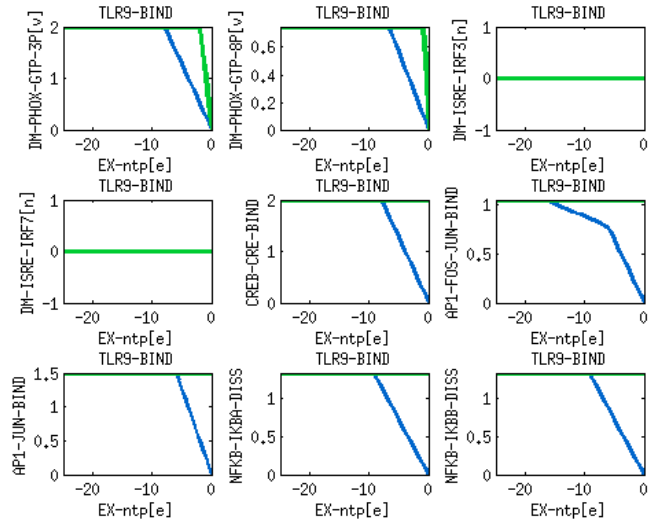

Figure 11. Sensitivity analysis

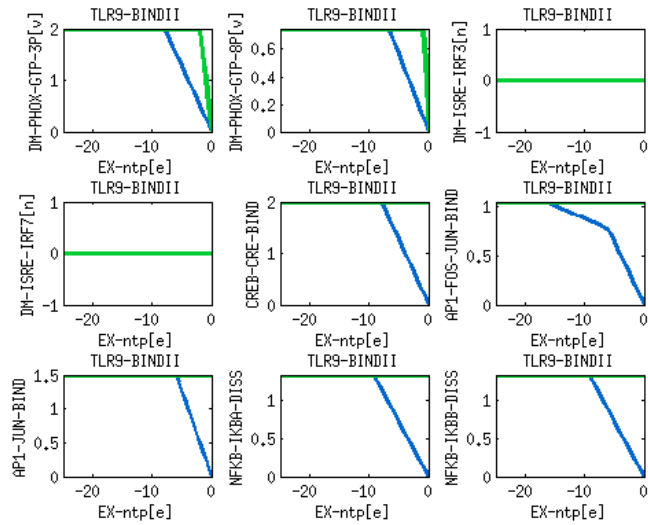

Figure 12. Sensitivity analysis

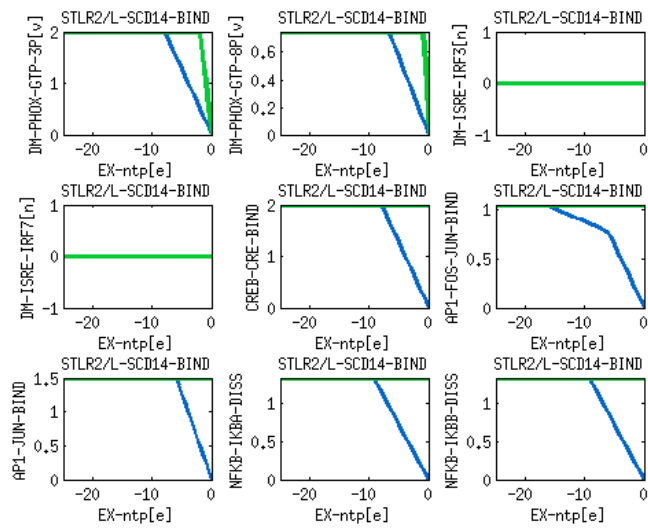

Figure 13. Sensitivity analysis
